# Supplementary material for: A Novel Tool for the Assessment of Pain: Validation in Low Back Pain
Source: PLoS Med. 2009 Apr 7;6(4):e1000047. doi: 10.1371/journal.pmed.1000047 (PMC2661253; doi:10.1371/journal.pmed.1000047)
Supplement: Text S2 — StEP score sheet for the distinction between radicular and axial low back pain. (0.07 MB PDF) [file pmed.1000047.s006.pdf]

# Standardized Evaluation of Pain (StEP) Neuropathic Pain

**Score sheet** for the distinction between neuropathic and non-neuropathic low back pain

Patient's name: \_\_\_\_\_ Patient ID \_\_\_\_\_  
 Date of birth: \_\_\_\_ / \_\_\_\_ / \_\_\_\_  
 Examiner's name: \_\_\_\_\_  
 Date of the examination: \_\_\_\_ / \_\_\_\_ / \_\_\_\_

## Radicular versus axial low back pain

StEP may be used to help discriminate between neuropathic (radicular) and non-neuropathic (axial) low back pain. The score sheet below lists interview questions and physical tests included in StEP that assess symptoms and signs of radicular back pain. Transfer responses to these questions and test results from the previous pages of StEP and add the scores.

**If the total score is  $\geq 4$ , low back pain is likely to be radicular.**

A total score  $< 4$  indicates axial low back pain.

| INTERVIEW            |                                                                                               |                              | Score |
|----------------------|-----------------------------------------------------------------------------------------------|------------------------------|-------|
| 2.3                  | <b>Pain all the time?</b>                                                                     | Yes <input type="checkbox"/> | -2    |
|                      |                                                                                               | No <input type="checkbox"/>  | 0     |
| 3.                   | <b>Pain quality</b>                                                                           |                              |       |
|                      | Burning (3.1) or cold (3.11), or both                                                         | Yes <input type="checkbox"/> | -1    |
|                      |                                                                                               | No <input type="checkbox"/>  | 0     |
| 5.                   | <b>Nonpainful sensations (any)</b>                                                            | Yes <input type="checkbox"/> | 1     |
|                      |                                                                                               | No <input type="checkbox"/>  | 0     |
| PHYSICAL EXAMINATION |                                                                                               |                              |       |
| 7.                   | <b>Skin changes (any)</b>                                                                     | Yes <input type="checkbox"/> | -3    |
|                      |                                                                                               | No <input type="checkbox"/>  | 0     |
| 9.                   | <b>Blunt pressure</b>                                                                         |                              |       |
|                      | Decreased response to blunt pressure or pressure-evoked pain                                  | Yes <input type="checkbox"/> | 1     |
|                      |                                                                                               | No <input type="checkbox"/>  | 0     |
| 10.                  | <b>Brush movement</b>                                                                         |                              |       |
|                      | Decreased response to brush movement or brush movement-evoked pain                            | Yes <input type="checkbox"/> | -2    |
|                      |                                                                                               | No <input type="checkbox"/>  | 0     |
| 11.1                 | <b>Decreased response to vibration</b>                                                        | Yes <input type="checkbox"/> | 1     |
|                      |                                                                                               | No <input type="checkbox"/>  | 0     |
| 12.                  | <b>Pinprick</b>                                                                               |                              |       |
|                      | Decreased response to pinprick or excess pinprick-evoked pain                                 | Yes <input type="checkbox"/> | 2     |
|                      |                                                                                               | No <input type="checkbox"/>  | 0     |
| 14.                  | <b>Cold temperature</b>                                                                       |                              |       |
|                      | Decreased response to cold temperature or cold-evoked pain                                    | Yes <input type="checkbox"/> | 3     |
|                      |                                                                                               | No <input type="checkbox"/>  | 0     |
| 15.                  | <b>Temporal summation</b>                                                                     |                              |       |
|                      | A nonpainful response turns into pain or pain intensity increases during repeated stimulation | Yes <input type="checkbox"/> | -1    |
|                      |                                                                                               | No <input type="checkbox"/>  | 0     |
| 16.1                 | <b>Radicular pain produced in the straight-leg-raising test</b>                               | Yes <input type="checkbox"/> | 7     |
|                      |                                                                                               | No <input type="checkbox"/>  | 0     |
| <b>Total score</b>   |                                                                                               |                              | _____ |
